# Supplementary material
Source: MDPI journal article supplement (https://www.mdpi.com/2079-9292/10/12/1463)
Supplement: s1 [file s1]

# Supplementary Materials

## DeepSGP: Deep Learning for Gene Selection and Survival Group Prediction in Glioblastoma

Ritaban Kirtania, Subhashis Banerjee, Sayantan Laha,  
B. Uma Shankar, Raghunath Chatterjee and Sushmita Mitra

### S1. Subset of gene IDs selected before application of the seven filters

Table S1: Subset of gene IDs selected before application of the seven filters.

|                 |                 |                 |                 |                 |                 |
|-----------------|-----------------|-----------------|-----------------|-----------------|-----------------|
| ENSG00000127993 | ENSG00000110203 | ENSG00000140263 | ENSG00000169429 | ENSG00000204241 | ENSG00000105650 |
| ENSG00000149380 | ENSG00000248528 | ENSG00000142748 | ENSG00000169436 | ENSG00000204962 | ENSG00000186940 |
| ENSG00000159167 | ENSG00000111321 | ENSG00000143632 | ENSG00000169894 | ENSG00000204963 | ENSG00000213139 |
| ENSG00000101825 | ENSG00000231394 | ENSG00000174567 | ENSG00000170160 | ENSG00000205358 | ENSG00000198719 |
| ENSG00000234707 | ENSG00000124721 | ENSG00000144057 | ENSG00000231427 | ENSG00000206129 | ENSG00000234336 |
| ENSG00000007312 | ENSG00000112759 | ENSG00000204381 | ENSG00000170837 | ENSG00000211892 | ENSG00000106537 |
| ENSG00000077274 | ENSG00000112874 | ENSG00000144810 | ENSG00000170955 | ENSG00000211895 | ENSG00000106683 |
| ENSG00000197467 | ENSG00000113070 | ENSG00000145014 | ENSG00000215644 | ENSG00000224650 | ENSG00000107438 |
| ENSG00000135407 | ENSG00000113248 | ENSG00000145283 | ENSG00000171681 | ENSG00000214110 | ENSG00000107984 |
| ENSG00000261409 | ENSG00000113303 | ENSG00000145536 | ENSG00000171819 | ENSG00000214193 | ENSG00000197084 |
| ENSG00000029534 | ENSG00000113389 | ENSG00000145545 | ENSG00000172460 | ENSG00000215474 | ENSG00000136720 |
| ENSG00000029559 | ENSG00000113532 | ENSG00000145623 | ENSG00000261625 | ENSG00000223475 | ENSG00000136944 |
| ENSG00000034152 | ENSG00000113600 | ENSG00000145777 | ENSG00000173702 | ENSG00000224057 | ENSG00000137507 |
| ENSG00000205212 | ENSG00000114993 | ENSG00000146592 | ENSG00000173805 | ENSG00000224596 | ENSG00000137673 |
| ENSG00000124882 | ENSG00000115239 | ENSG00000146729 | ENSG00000174226 | ENSG00000225698 | ENSG00000137731 |
| ENSG00000048545 | ENSG00000115604 | ENSG00000147206 | ENSG00000174403 | ENSG00000225886 | ENSG00000138316 |
| ENSG00000049656 | ENSG00000116745 | ENSG00000148942 | ENSG00000174799 | ENSG00000225940 | ENSG00000272369 |
| ENSG00000213214 | ENSG00000117152 | ENSG00000149656 | ENSG00000229762 | ENSG00000226833 | ENSG00000139269 |
| ENSG00000054356 | ENSG00000117625 | ENSG00000149968 | ENSG00000175426 | ENSG00000226939 | ENSG00000198707 |
| ENSG00000180347 | ENSG00000118785 | ENSG00000150275 | ENSG00000175782 | ENSG00000227165 | ENSG00000140262 |
| ENSG00000061337 | ENSG00000118849 | ENSG00000151468 | ENSG00000176124 | ENSG00000271287 | ENSG00000165511 |
| ENSG00000064218 | ENSG00000120696 | ENSG00000152592 | ENSG00000176771 | ENSG00000228061 | ENSG00000165730 |
| ENSG00000070495 | ENSG00000123892 | ENSG00000153561 | ENSG00000176907 | ENSG00000228522 | ENSG00000166348 |
| ENSG00000071282 | ENSG00000123989 | ENSG00000153976 | ENSG00000227496 | ENSG00000230006 | ENSG00000166415 |
| ENSG00000174206 | ENSG00000173918 | ENSG00000154080 | ENSG00000177565 | ENSG00000231419 | ENSG00000167123 |
| ENSG00000123342 | ENSG00000124491 | ENSG00000154127 | ENSG00000178297 | ENSG00000232006 | ENSG00000167779 |
| ENSG00000161610 | ENSG00000124568 | ENSG00000155719 | ENSG00000178718 | ENSG00000232788 | ENSG00000168077 |
| ENSG00000078142 | ENSG00000125538 | ENSG00000156463 | ENSG00000178752 | ENSG00000233093 | ENSG00000168118 |
| ENSG00000080166 | ENSG00000125735 | ENSG00000157150 | ENSG00000179008 | ENSG00000233125 | ENSG00000168283 |
| ENSG00000082196 | ENSG00000125740 | ENSG00000158477 | ENSG00000179168 | ENSG00000233818 | ENSG00000242950 |
| ENSG00000083782 | ENSG00000233791 | ENSG00000158485 | ENSG00000179454 | ENSG00000234513 | ENSG00000241825 |
| ENSG00000086544 | ENSG00000126838 | ENSG00000158578 | ENSG00000180458 | ENSG00000235109 | ENSG00000197588 |
| ENSG00000086967 | ENSG00000166225 | ENSG00000159674 | ENSG00000181885 | ENSG00000236449 | ENSG00000198400 |
| ENSG00000088340 | ENSG00000128045 | ENSG00000160180 | ENSG00000237164 | ENSG00000237125 | ENSG00000198491 |
| ENSG00000088386 | ENSG00000128262 | ENSG00000160224 | ENSG00000183439 | ENSG00000237945 | ENSG00000198650 |
| ENSG00000137959 | ENSG00000128285 | ENSG00000161013 | ENSG00000183760 | ENSG00000239440 | ENSG00000198795 |
| ENSG00000144136 | ENSG00000129354 | ENSG00000162944 | ENSG00000183798 | ENSG00000248187 | ENSG00000223891 |
| ENSG00000170421 | ENSG00000130829 | ENSG00000163209 | ENSG00000184139 | ENSG00000249755 | ENSG00000203943 |
| ENSG00000095752 | ENSG00000131015 | ENSG00000185633 | ENSG00000229544 | ENSG00000250295 | ENSG00000203965 |
| ENSG00000099869 | ENSG00000131142 | ENSG00000163497 | ENSG00000185215 | ENSG00000250815 | ENSG00000203995 |

|                 |                 |                 |                 |                 |                 |
|-----------------|-----------------|-----------------|-----------------|-----------------|-----------------|
| ENSG00000100181 | ENSG00000131355 | ENSG00000163661 | ENSG00000185630 | ENSG00000251533 | ENSG00000264345 |
| ENSG00000163735 | ENSG00000131389 | ENSG00000163687 | ENSG00000187140 | ENSG00000253831 | ENSG00000265203 |
| ENSG00000164509 | ENSG00000132749 | ENSG00000163736 | ENSG00000187398 | ENSG00000253953 | ENSG00000268088 |
| ENSG00000100985 | ENSG00000132906 | ENSG00000163909 | ENSG00000187527 | ENSG00000254919 | ENSG00000270069 |
| ENSG00000101017 | ENSG00000133048 | ENSG00000163975 | ENSG00000187676 | ENSG00000256128 | ENSG00000274426 |
| ENSG00000198768 | ENSG00000237212 | ENSG00000164047 | ENSG00000187889 | ENSG00000256940 | ENSG00000274735 |
| ENSG00000101888 | ENSG00000133063 | ENSG00000164530 | ENSG00000188107 | ENSG00000257838 | ENSG00000276170 |
| ENSG00000101892 | ENSG00000254545 | ENSG00000239839 | ENSG00000188522 | ENSG00000258227 | ENSG00000280890 |
| ENSG00000101972 | ENSG00000139767 | ENSG00000164877 | ENSG00000188620 | ENSG00000258376 | ENSG00000281162 |
| ENSG00000102221 | ENSG00000135925 | ENSG00000165078 | ENSG00000189067 | ENSG00000258484 | ENSG00000281183 |
| ENSG00000102970 | ENSG00000136014 | ENSG00000165272 | ENSG00000189127 | ENSG00000259616 | ENSG00000103044 |
| ENSG00000136160 | ENSG00000165322 | ENSG00000196890 | ENSG00000279881 | ENSG00000275630 | ENSG00000136352 |
| ENSG00000165474 | ENSG00000197057 | ENSG00000261801 |                 |                 |                 |

## S2. Subset of gene IDs selected after application of the seven filters

### S2.1. CIFE

ENSG00000145014, ENSG00000145623, ENSG00000117625, ENSG00000140263, ENSG00000214110, ENSG00000106537, ENSG00000196890, ENSG00000112874, ENSG00000114993, ENSG00000189067, ENSG00000101888, ENSG00000198795, ENSG00000232788, ENSG00000171681, ENSG00000179454, ENSG0000048545, ENSG00000152778, ENSG00000203943, ENSG00000113248, ENSG00000120696, ENSG00000168077, ENSG00000168283, ENSG00000153561, ENSG00000214193, ENSG00000167123, ENSG00000177565, ENSG00000163909, ENSG00000136160, ENSG00000137731, ENSG00000148942, ENSG00000225886, ENSG00000115239, ENSG00000176771, ENSG00000173805, ENSG00000107438, ENSG00000226833, ENSG00000258227, ENSG0000049656, ENSG00000136720, ENSG00000137959, ENSG00000175782, ENSG00000204241, ENSG00000178718, ENSG00000235109, ENSG00000223891, ENSG00000281162, ENSG00000131015, ENSG00000183615, ENSG00000101017, ENSG00000146592.

### S2.2. DISR

ENSG00000145014, ENSG00000145623, ENSG00000125740, ENSG00000181885, ENSG00000061337, ENSG00000163661, ENSG00000167779, ENSG00000204962, ENSG00000261801, ENSG00000130829, ENSG00000163735, ENSG00000144136, ENSG00000239440, ENSG00000254919, ENSG00000242950, ENSG00000237125, ENSG00000169436, ENSG00000234354, ENSG00000183798, ENSG00000254545, ENSG00000118113, ENSG00000086544, ENSG00000100181, ENSG00000137959, ENSG00000250295, ENSG00000113303, ENSG00000078142, ENSG00000166348, ENSG00000136014, ENSG00000230006, ENSG00000157150, ENSG00000137731, ENSG00000107984, ENSG00000113532, ENSG00000117625, ENSG00000124882, ENSG00000179008, ENSG00000187527, ENSG00000197467, ENSG00000132906, ENSG00000180458, ENSG00000168077, ENSG00000088386, ENSG00000103855, ENSG00000150275, ENSG00000224650, ENSG00000160180, ENSG00000162458, ENSG00000179168, ENSG00000145423.

### S2.3. ICAP

ENSG00000145014, ENSG00000145623, ENSG00000117625, ENSG00000078142, ENSG00000101972, ENSG00000137731, ENSG00000185630, ENSG00000214110, ENSG00000196890, ENSG00000189067, ENSG00000106537, ENSG00000173805, ENSG00000113248, ENSG00000146592, ENSG00000198795, ENSG00000226833, ENSG00000140263, ENSG00000176124, ENSG00000171681, ENSG00000136720, ENSG00000144810, ENSG00000165730, ENSG00000281183, ENSG00000163909, ENSG00000214193, ENSG00000205358, ENSG00000148942, ENSG00000178718, ENSG00000155719, ENSG00000183615, ENSG00000177565, ENSG00000172460, ENSG00000164877, ENSG00000153976, ENSG00000235109, ENSG00000143845, ENSG00000168118, ENSG00000131015, ENSG00000197057, ENSG00000114993, ENSG00000152778, ENSG00000170837, ENSG00000168283, ENSG00000179454, ENSG00000196850, ENSG00000146729, ENSG00000187676, ENSG00000007312, ENSG00000105650, ENSG00000166415.

### S2.4. JMI

ENSG00000145014, ENSG00000145623, ENSG00000117625, ENSG00000078142, ENSG00000137731, ENSG00000136160, ENSG00000181885, ENSG00000179168, ENSG00000168077, ENSG00000185630, ENSG00000153561, ENSG00000198795, ENSG00000261801, ENSG00000233818, ENSG00000176124, ENSG00000101972, ENSG00000136720, ENSG00000070495, ENSG00000249755, ENSG00000189067, ENSG00000214110, ENSG00000162944, ENSG00000103855, ENSG00000101017, ENSG00000086544, ENSG00000254919, ENSG00000106537, ENSG00000120696, ENSG00000112874, ENSG00000146592, ENSG00000166348, ENSG00000111321, ENSG00000102221, ENSG00000137959, ENSG00000167779, ENSG00000049656, ENSG00000173805, ENSG00000196890, ENSG00000178718, ENSG00000165322, ENSG00000204241, ENSG00000034152, ENSG00000144136, ENSG00000183798, ENSG00000164877, ENSG00000163661, ENSG00000136014, ENSG00000061337, ENSG00000151468, ENSG00000168283.

### S2.5. MIFS

ENSG00000145014, ENSG00000181885, ENSG00000130829, ENSG00000204962, ENSG00000178752, ENSG00000113600, ENSG00000124568, ENSG00000166225, ENSG00000205212, ENSG00000171819, ENSG00000129354, ENSG00000135407, ENSG00000083782, ENSG00000198719,

ENSG00000234336, ENSG00000124721, ENSG00000198707, ENSG00000198491, ENSG00000253953, ENSG00000280890, ENSG00000102970, ENSG00000118849, ENSG00000139767, ENSG00000231427, ENSG00000198400, ENSG00000127993, ENSG00000128045, ENSG00000257910, ENSG00000161610, ENSG00000231394, ENSG00000237212, ENSG00000099869, ENSG00000101892, ENSG00000224057, ENSG00000082196, ENSG00000112759, ENSG00000234707, ENSG00000077274, ENSG00000274426, ENSG00000173702, ENSG00000215644, ENSG00000229762, ENSG00000187889, ENSG00000197084, ENSG00000229544, ENSG00000236449, ENSG00000188107, ENSG00000272369, ENSG00000118113, ENSG00000164509.

## S2.6. MIM

ENSG00000145014, ENSG00000145623, ENSG00000181885, ENSG00000117625, ENSG00000179168, ENSG00000078142, ENSG00000261801, ENSG00000185630, ENSG00000086544, ENSG00000144136, ENSG00000167779, ENSG00000103855, ENSG00000137731, ENSG00000168077, ENSG00000249755, ENSG00000233818, ENSG00000101972, ENSG00000061337, ENSG00000163661, ENSG00000254919, ENSG00000070495, ENSG00000176124, ENSG00000111321, ENSG00000136160, ENSG00000153561, ENSG00000198795, ENSG00000254545, ENSG00000163735, ENSG00000169436, ENSG00000162944, ENSG00000166348, ENSG00000101017, ENSG00000136720, ENSG00000120696, ENSG00000102221, ENSG00000183798, ENSG00000137959, ENSG00000174226, ENSG00000112874, ENSG00000189067, ENSG00000049656, ENSG00000034152, ENSG00000151468, ENSG00000130829, ENSG00000107984, ENSG00000113303, ENSG00000161013, ENSG00000183439, ENSG00000157150, ENSG00000164877.

## S2.7. MRMR

ENSG00000145014, ENSG00000181885, ENSG00000078142, ENSG00000163661, ENSG00000130829, ENSG00000145623, ENSG00000183798, ENSG00000117625, ENSG00000137731, ENSG00000239440, ENSG00000261801, ENSG00000254919, ENSG00000237125, ENSG00000204962, ENSG00000101972, ENSG00000179168, ENSG00000168077, ENSG00000157150, ENSG00000167779, ENSG00000242950, ENSG00000250295, ENSG00000111321, ENSG00000061337, ENSG00000137959, ENSG00000163735, ENSG00000136014, ENSG00000249755, ENSG00000234354, ENSG00000113303, ENSG00000166348, ENSG00000174226, ENSG00000169436, ENSG00000254545, ENSG00000070495, ENSG00000086544, ENSG00000113248, ENSG00000224650, ENSG00000154080, ENSG00000176124, ENSG00000179008, ENSG00000230006, ENSG00000144136, ENSG00000153561, ENSG00000125740, ENSG00000183439, ENSG00000187527, ENSG00000118113, ENSG00000268088, ENSG00000233818, ENSG00000136160.

## S2.8. Overlapping genes IDs between different subsets selected by filters

ENSG00000145014, ENSG00000117625, ENSG00000137731, ENSG00000145623, ENSG00000078142, ENSG00000137959, ENSG00000168077, ENSG00000181885, ENSG00000061337, ENSG00000086544, ENSG00000101972, ENSG00000130829, ENSG00000136160, ENSG00000136720, ENSG00000144136, ENSG00000153561, ENSG00000163661, ENSG00000166348, ENSG00000167779, ENSG00000176124, ENSG00000179168, ENSG00000183798, ENSG00000189067, ENSG00000198795, ENSG00000254919, ENSG00000261801, ENSG00000049656, ENSG00000070495, ENSG00000101017, ENSG00000103855, ENSG00000106537, ENSG00000111321, ENSG00000112874, ENSG00000113248, ENSG00000113303, ENSG00000118113, ENSG00000120696, ENSG00000136014, ENSG00000146592, ENSG00000157150, ENSG00000163735, ENSG00000164877, ENSG00000168283, ENSG00000169436, ENSG00000173805, ENSG00000178718, ENSG00000185630, ENSG00000196890, ENSG00000204962, ENSG00000214110.

### S3. The IDs of the subset of shortlisted 100 genes for pathway analysis

Table S2: The IDs of the subset of shortlisted 100 genes for pathway analysis.

|                 |                 |                 |                 |                 |                 |
|-----------------|-----------------|-----------------|-----------------|-----------------|-----------------|
| ENSG00000034152 | ENSG00000187676 | ENSG00000113070 | ENSG00000234513 | ENSG00000138316 | ENSG00000204241 |
| ENSG00000137673 | ENSG00000124568 | ENSG00000169436 | ENSG00000139269 | ENSG00000224057 | ENSG00000159674 |
| ENSG00000133048 | ENSG00000117625 | ENSG00000145283 | ENSG00000235109 | ENSG00000171681 | ENSG00000261625 |
| ENSG00000261801 | ENSG00000196890 | ENSG00000225886 | ENSG00000128285 | ENSG00000166415 | ENSG00000256128 |
| ENSG00000214110 | ENSG00000179168 | ENSG00000101888 | ENSG00000161610 | ENSG00000083782 | ENSG00000198795 |
| ENSG00000188522 | ENSG00000173702 | ENSG00000113248 | ENSG00000149968 | ENSG00000100985 | ENSG00000165322 |
| ENSG00000187140 | ENSG00000204963 | ENSG00000137959 | ENSG00000174403 | ENSG00000164047 | ENSG00000169429 |
| ENSG00000233818 | ENSG00000145014 | ENSG00000281183 | ENSG00000265203 | ENSG00000254545 | ENSG00000123989 |
| ENSG00000155719 | ENSG00000106537 | ENSG00000164877 | ENSG00000168283 | ENSG00000163661 | ENSG00000144057 |
| ENSG00000125735 | ENSG00000170160 | ENSG00000102970 | ENSG00000173918 | ENSG00000223475 | ENSG00000158477 |
| ENSG00000101972 | ENSG00000148942 | ENSG00000205358 | ENSG00000180347 | ENSG00000178752 | ENSG00000077274 |
| ENSG00000233791 | ENSG00000163687 | ENSG00000168118 | ENSG00000258227 | ENSG00000198491 | ENSG00000181885 |
| ENSG00000228522 | ENSG00000129354 | ENSG00000236449 | ENSG00000197588 | ENSG00000237945 | ENSG00000226833 |
| ENSG00000162944 | ENSG00000161013 | ENSG00000174226 | ENSG00000213214 | ENSG00000049656 | ENSG00000125740 |
| ENSG00000071282 | ENSG00000231419 | ENSG00000061337 | ENSG00000183760 | ENSG00000160180 | ENSG00000198768 |
| ENSG00000188620 | ENSG00000237125 | ENSG00000186940 | ENSG00000170837 | ENSG00000178718 | ENSG00000158485 |
| ENSG00000213139 | ENSG00000165078 | ENSG00000088340 | ENSG00000261409 |                 |                 |

## S4. List of pathways identified

Table S3: List of pathways identified.

| GOID                                           | KEGG:04657                       | KEGG:05219           | R-HSA:3906995                                        | R-HSA:5083635                                       | R-HSA:5173214                                     |
|------------------------------------------------|----------------------------------|----------------------|------------------------------------------------------|-----------------------------------------------------|---------------------------------------------------|
| GO Term                                        | IL-17 signaling pathway          | Bladder cancer       | Diseases associated with O-glycosylation of proteins | Defective B3GALTL causes Peters-plus syndrome (PpS) | O-glycosylation of TSR domain-containing proteins |
| Ontology Source                                | KEGG                             | KEGG                 | REACTOME                                             | REACTOME                                            | REACTOME                                          |
| Term PValue                                    | 0.000039                         | 0.000619             | 0.000168                                             | 0.000456                                            | 0.000494                                          |
| Term PValue Corrected with Benjamini-Hochberg  | 0.000196                         | 0.000773             | 0.000558                                             | 0.000760                                            | 0.000705                                          |
| Group PValue                                   | 0.000039                         | 0.000619             | 0.000177                                             | 0.000177                                            | 0.000177                                          |
| Group PValue Corrected with Benjamini-Hochberg | 0.000157                         | 0.000619             | 0.000236                                             | 0.000236                                            | 0.000236                                          |
| GO Levels                                      | [-1]                             | [-1]                 | [-1]                                                 | [-1]                                                | [-1]                                              |
| GO Groups                                      | Group0                           | Group1               | Group2                                               | Group2                                              | Group2                                            |
| % Associated Genes                             | 5.32                             | 7.32                 | 5.88                                                 | 8.11                                                | 7.89                                              |
| Nr. Genes                                      | 5                                | 3                    | 4                                                    | 3                                                   | 3                                                 |
| Associated Genes Found                         | [CCL17, CXCL8, FOSB, MMP3, MMP9] | [CXCL8, HBEGF, MMP9] | [ADAMTS14, B3GLCT, MUC13, SPON2]                     | [ADAMTS14, B3GLCT, SPON2]                           | [ADAMTS14, B3GLCT, SPON2]                         |

Table S4: List of pathways identified.

| GOID                                           | R-HSA:1442490        | R-HSA:1474290                         | R-HSA:1592389                           | R-HSA:2022090                                                | R-HSA:9009391                    |
|------------------------------------------------|----------------------|---------------------------------------|-----------------------------------------|--------------------------------------------------------------|----------------------------------|
| GO Term                                        | Collagen degradation | Collagen formation                    | Activation of Matrix Metalloproteinases | Assembly of collagen fibrils and other multimeric structures | Extra-nuclear estrogen signaling |
| Ontology Source                                | REACTOME             | REACTOME                              | REACTOME                                | REACTOME                                                     | REACTOME                         |
| Term PValue                                    | 0.002263             | 0.000032                              | 0.000324                                | 0.001972                                                     | 0.000271                         |
| Term PValue Corrected with Benjamini-Hochberg  | 0.002263             | 0.000318                              | 0.000648                                | 0.002191                                                     | 0.000677                         |
| Group PValue                                   | 0.000148             | 0.000148                              | 0.000148                                | 0.000148                                                     | 0.000148                         |
| Group PValue Corrected with Benjamini-Hochberg | 0.000297             | 0.000297                              | 0.000297                                | 0.000297                                                     | 0.000297                         |
| GO Levels                                      | [-1]                 | [-1]                                  | [-1]                                    | [-1]                                                         | [-1]                             |
| GO Groups                                      | Group3               | Group3                                | Group3                                  | Group3                                                       | Group3                           |
| % Associated Genes                             | 4.69                 | 5.56                                  | 9.09                                    | 4.92                                                         | 5.19                             |
| Nr. Genes                                      | 3                    | 5                                     | 3                                       | 3                                                            | 4                                |
| Associated Genes Found                         | [MMP3, MMP7, MMP9]   | [ADAMTS14, COL22A1, MMP3, MMP7, MMP9] | [MMP3, MMP7, MMP9]                      | [MMP3, MMP7, MMP9]                                           | [HBEGF, MMP3, MMP7, MMP9]        |
